# Supplementary material for: Diversity of Ophiostomatoid Fungi Associated with Dendroctonus armandi Infesting Pinus armandii in Western China
Source: MDPI journal article supplement (doi:10.3390/jof8030214), 2022-02-22
Supplement: s1 [file s1]

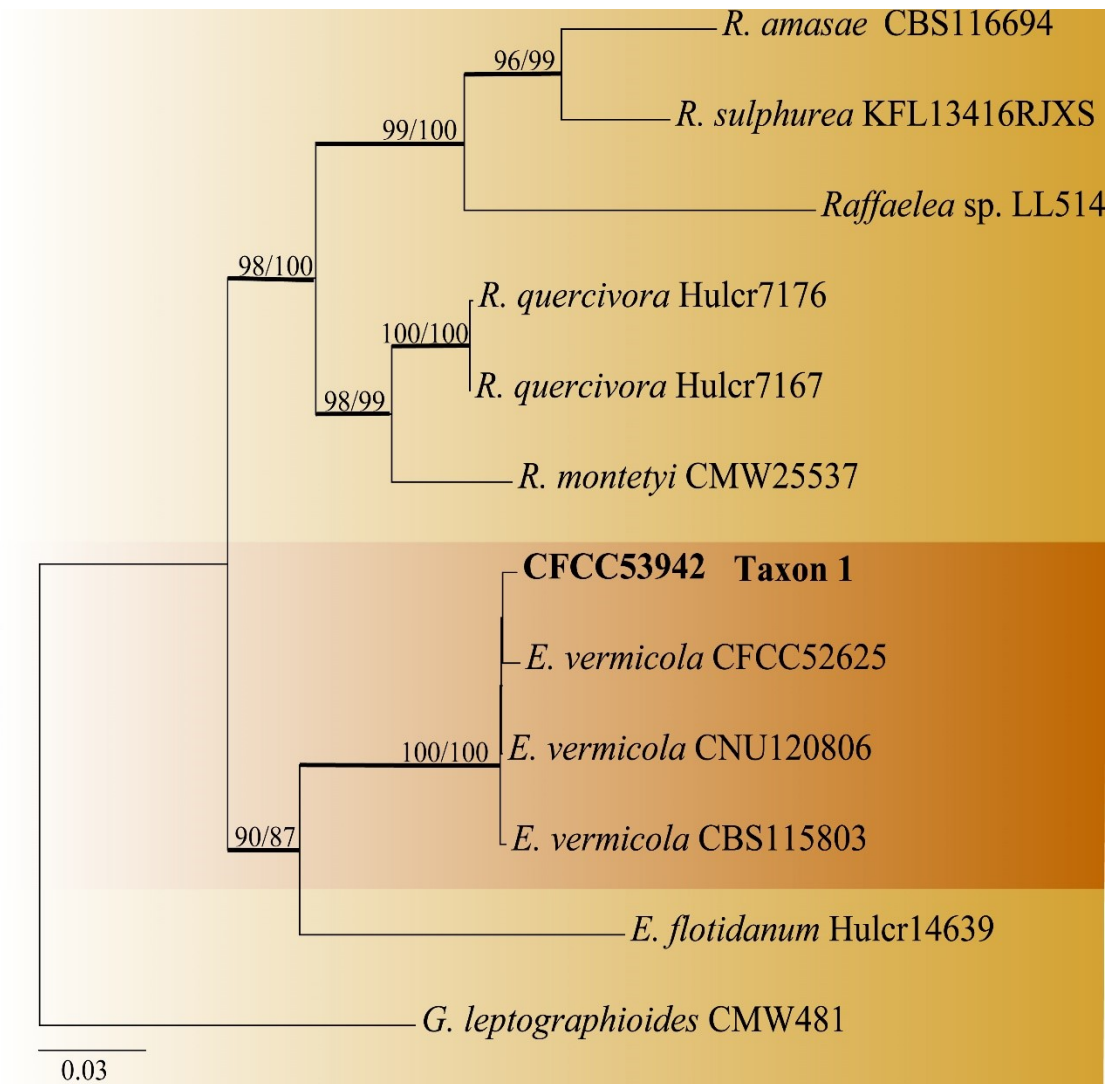

**Supplementary Figure S1.** ML tree of *Esteya* and related taxa (Taxon 1) generated from the combined (LSU+TUB2) sequence data. Novel sequences obtained in this study are presented in bold typeface. Bold branches indicate posterior probability values  $\geq 0.9$ . Bootstrap values  $\geq 70\%$  for ML and MP are indicated above branches.

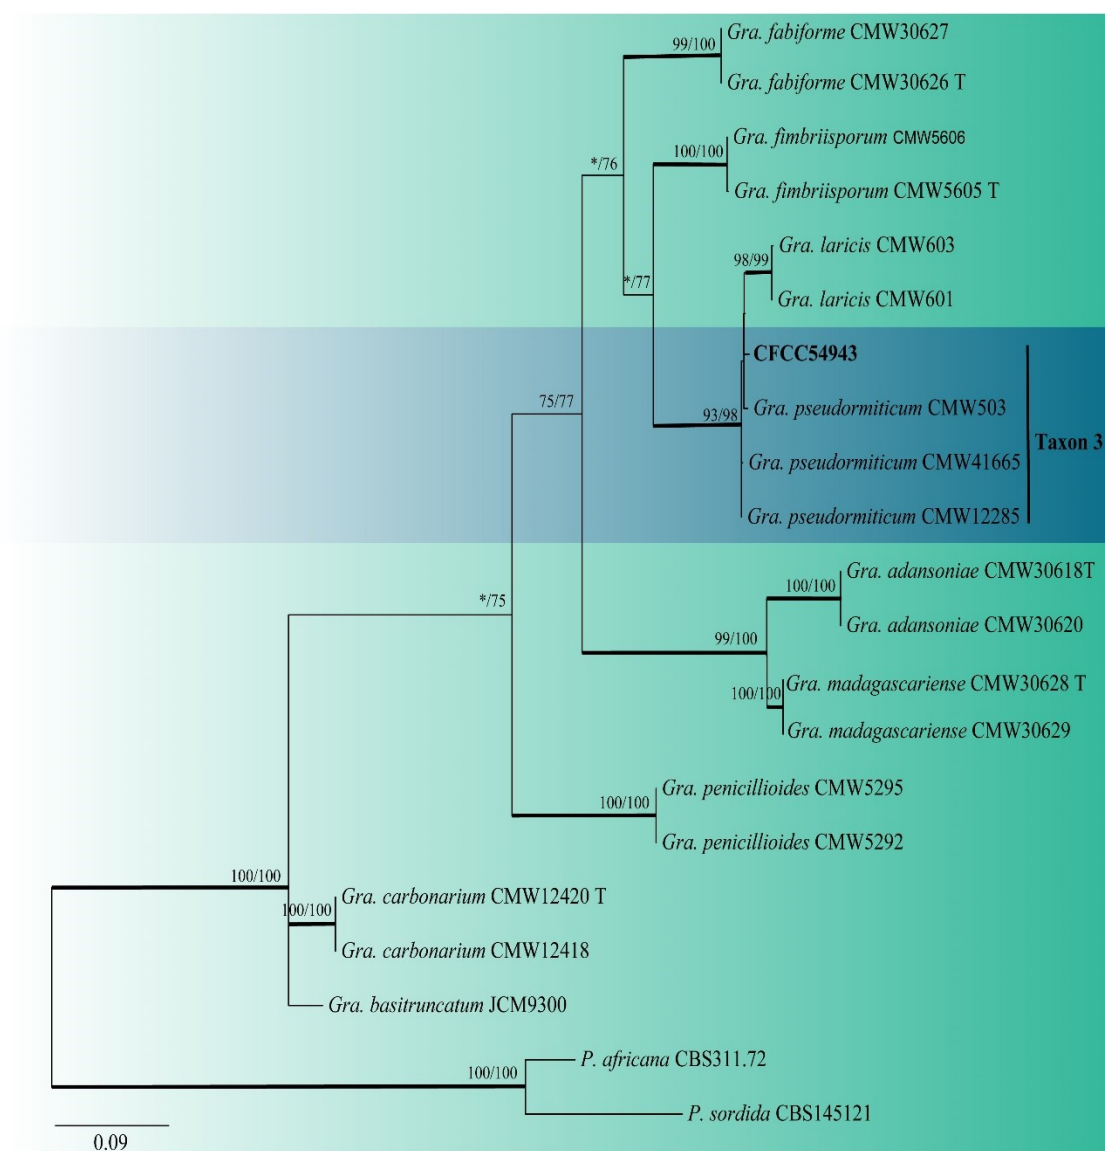

**Supplementary Figure S2.** ML tree of *Graphium* (Taxon 3) generated from the combined (ITS+tEF1- $\alpha$ ) sequence data. Novel sequences obtained in this study are presented in bold typeface. Bold branches indicate posterior probability values  $\geq 0.9$ . Bootstrap values  $\geq 70\%$  for ML and MP are indicated above branches. Bootstrap values  $< 70\%$  are indicated by \*.
